# Supplementary material for: Longitudinal changes in estimated glomerular filtration rates in chronic hepatitis B patients treated with Tenofovir Alafenamide vs Entecavir
Source: PeerJ journal article supplement (doi:10.7717/peerj.19901), 2025-08-26
Supplement: Table_S1.docx [file Table_S1.docx]

Table S1 The interaction between treatment groups and sex or age per 12 weeks

| TAF vs. ETV | Model 1 | | Model 2 | | Model 3 | |
| --- | --- | --- | --- | --- | --- | --- |
| β (95% CI) | *P* value | β (95% CI) | *P* value | β (95% CI) | *P* value |
| Group*sex |  |  |  |  |  |  |
| male vs. female | -0.90(-5.40–3.60) | 0.695 | -2.14(-4.29–0.01) | 0.051 | -1.75(-3.89–0.39) | 0.110 |
| Group*age |  |  |  |  |  |  |
| ≥ 35 years vs. < 35 years | 3.81(0.10–7.53) | 0.045 | 0.86(-1.11–2.83) | 0.392 | 1.14(-0.82–3.10) | 0.255 |

Model 1: unadjusted model.

Model 2: adjusted for all variables.

Model 3: adjusted for the variables of which *p* < 0.05 in Model 2: diuretics, age, sex, baseline eGFR, and HBeAg positivity.
