# Supplementary material for: Longitudinal changes in estimated glomerular filtration rates in chronic hepatitis B patients treated with Tenofovir Alafenamide vs Entecavir
Source: PeerJ journal article supplement (doi:10.7717/peerj.19901), 2025-08-26
Supplement: Table_S2.docx [file Table_S2.docx]

Table S2 Average slope differences of 0 to 12, 12 to 24, 24 to 48, and 48 to 86 weeks between ETV and TAF groups based on the LMM model

| Interval | ETV group | TAF group | *P* value |
| --- | --- | --- | --- |
| 0–12 weeks | -0.20 (-0.32, -0.07) | -0.40 (-0.56, -0.24) | 0.049 |
| 12–24 weeks | -0.07 (-0.21, -0.08) | -0.15 (-0.33, 0.02) | 0.455 |
| 24–48 weeks | -0.10 (-0.17, -0.47) | 0.09 (0.01, 0.18) | < 0.001 |
| 48–86 weeks | -0.01 (-0.04, 0.01) | 0.002 (-0.039, 0.042) | 0.539 |
